# Supplementary material for: Environmental Sustainability Analysis of L-Tryptophan as a Consumer Product and Intermediate to Pharmaceutical Active Ingredients
Source: Frontiers journal article supplement (doi:10.3389/frsus.2022.863914), 2022-05-02
Supplement: Data_Sheet_1.xlsx [file Data_Sheet_1.xlsx]

## Sheet: Sheet1
Cradle to gate chemical tree for tryptophan, -L
Key	Natural resources	Unallocated	Allocated
All numerical values are mass of chemicals entering the synthesis step to the left
Level 1	Level 2	Level 3	Level 4	Level 5	Level 6	Level 7	Level 8	Level 9	Level 10	Level 11	Level 12
tryptophan, -L	Ammonium Hydroxide	Ammonia	Natural gas	blue water
1000 kg	1419.63	690.234	142.231	46.0237
				Natural gas (unprocessed)
				145.075
			nitrogen from air	Air (untreated)
			265.465	265.465
			oxygen from air	Air (untreated)
			117.843	117.844
			Water for rxn	Water (untreated)
			184.051	184.051
		Water for rxn	Water (untreated)
		729.396	729.396
	dextrose in 35 wt db syrup	Calcium hydroxide	Calcium carbonate	Limestone (in ground)
	5309.14	1.13685	1.36365	1.46626
			Carbon dioxide	Natural gas	blue water
			0.255222	0.0525915	0.0170178
					Natural gas (unprocessed)
					0.0536433
				nitrogen from air	Air (untreated)
				0.0981586	0.0981588
				oxygen from air	Air (untreated)
				0.043574	0.0435741
				Water for rxn	Water (untreated)
				0.0680551	0.0680551
			Water for rxn	Water (untreated)
			0.243285	0.243285
		corn starch	Corn	K in Fertilizer	Potassium chloride	Sylvinite ore	sylvinite ore (in ground)
		4772.5	5631.75	32.2849	64.8291	190.096	190.096
				N in fertilizer	Ammonia	Natural gas	blue water
				104.187	67.7218	13.9549	4.51558
							Natural gas (unprocessed)
							14.234
						nitrogen from air	Air (untreated)
						26.0459	26.0459
						oxygen from air	Air (untreated)
						11.5621	11.5621
						Water for rxn	Water (untreated)
						18.0581	18.0581
					N in DAP	diammonium phosphate (DAP)	Ammonia	Natural gas	blue water
					10.3146	23.3361	5.9927	1.23487	0.399584
									Natural gas (unprocessed)
									1.25956
								nitrogen from air	Air (untreated)
								2.3048	2.3048
								oxygen from air	Air (untreated)
								1.02313	1.02313
								Water for rxn	Water (untreated)
								1.59796	1.59796
							Phosphoric acid	Phosphate rock	phosphate ore, in ground
							17.2383	37.3755	130.334
								Sulfuric acid	Sulfur trioxide	oxygen from air	Air (untreated)
								32.0362	26.0076	16.1528	16.1528
										Sulfur	oil (in ground)
										11.2152	11.5517
										Water for rxn	Water (untreated)
										0.979271	0.979271
									Water for rxn	Water (untreated)
									6.50482	6.50482
								Water for rxn	Water (untreated)
								10.1143	10.1143
					Urea	Ammonia	Natural gas	blue water
					83.1415	47.0747	9.7003	3.13887
								Natural gas (unprocessed)
								9.89431
							nitrogen from air	Air (untreated)
							18.105	18.105
							oxygen from air	Air (untreated)
							8.03706	8.03707
							Water for rxn	Water (untreated)
							12.5525	12.5525
						Carbon dioxide	Natural gas	blue water
						60.8264	12.534	4.05581
								Natural gas (unprocessed)
								12.7847
							nitrogen from air	Air (untreated)
							23.3939	23.3939
							oxygen from air	Air (untreated)
							10.3849	10.3849
							Water for rxn	Water (untreated)
							16.2194	16.2194
				P in fertilizer	P in DAP	diammonium phosphate (DAP)	Ammonia	Natural gas	blue water
				20.63	20.63	46.6741	11.9859	2.46984	0.799202
									Natural gas (unprocessed)
									2.51924
								nitrogen from air	Air (untreated)
								4.6098	4.6098
								oxygen from air	Air (untreated)
								2.04635	2.04636
								Water for rxn	Water (untreated)
								3.19605	3.19605
							Phosphoric acid	Phosphate rock	phosphate ore, in ground
							34.4782	74.7543	260.679
								Sulfuric acid	Sulfur trioxide	oxygen from air	Air (untreated)
								64.0751	52.0175	32.307	32.3071
										Sulfur	oil (in ground)
										22.4314	23.1044
										Water for rxn	Water (untreated)
										1.95863	1.95863
									Water for rxn	Water (untreated)
									13.0102	13.0102
								Water for rxn	Water (untreated)
								20.2294	20.2294
		Water for rxn	Water (untreated)
		530.277	530.277
	ethanol	Corn	K in Fertilizer	Potassium chloride	Sylvinite ore	sylvinite ore (in ground)
	20	32.36	0.185509	0.372507	1.09229	1.09229
			N in fertilizer	Ammonia	Natural gas	blue water
			0.59866	0.389129	0.0801846	0.0259465
						Natural gas (unprocessed)
						0.0817883
					nitrogen from air	Air (untreated)
					0.149659	0.14966
					oxygen from air	Air (untreated)
					0.0664359	0.066436
					Water for rxn	Water (untreated)
					0.103761	0.103761
				N in DAP	diammonium phosphate (DAP)	Ammonia	Natural gas	blue water
				0.0592673	0.134089	0.034434	0.00709553	0.00229601
								Natural gas (unprocessed)
								0.00723744
							nitrogen from air	Air (untreated)
							0.0132433	0.0132434
							oxygen from air	Air (untreated)
							0.00587891	0.00587892
							Water for rxn	Water (untreated)
							0.00918184	0.00918185
						Phosphoric acid	Phosphate rock	phosphate ore, in ground
						0.0990514	0.21476	0.748898
							Sulfuric acid	Sulfur trioxide	oxygen from air	Air (untreated)
							0.18408	0.149439	0.0928139	0.0928141
									Sulfur	oil (in ground)
									0.0644426	0.0663759
									Water for rxn	Water (untreated)
									0.00562688	0.00562688
								Water for rxn	Water (untreated)
								0.0373766	0.0373766
							Water for rxn	Water (untreated)
							0.0581165	0.0581165
				Urea	Ammonia	Natural gas	blue water
				0.477731	0.270491	0.0557378	0.0180359
							Natural gas (unprocessed)
							0.0568526
						nitrogen from air	Air (untreated)
						0.104031	0.104031
						oxygen from air	Air (untreated)
						0.0461809	0.046181
						Water for rxn	Water (untreated)
						0.0721266	0.0721266
					Carbon dioxide	Natural gas	blue water
					0.349508	0.0720201	0.0233046
							Natural gas (unprocessed)
							0.0734605
						nitrogen from air	Air (untreated)
						0.134421	0.134421
						oxygen from air	Air (untreated)
						0.0596714	0.0596715
						Water for rxn	Water (untreated)
						0.0931964	0.0931964
			P in fertilizer	P in DAP	diammonium phosphate (DAP)	Ammonia	Natural gas	blue water
			0.11854	0.11854	0.268189	0.068871	0.0141917	0.00459221
								Natural gas (unprocessed)
								0.0144755
							nitrogen from air	Air (untreated)
							0.0264879	0.0264879
							oxygen from air	Air (untreated)
							0.0117583	0.0117584
							Water for rxn	Water (untreated)
							0.0183645	0.0183645
						Phosphoric acid	Phosphate rock	phosphate ore, in ground
						0.198111	0.429538	1.49786
							Sulfuric acid	Sulfur trioxide	oxygen from air	Air (untreated)
							0.368175	0.298892	0.185636	0.185636
									Sulfur	oil (in ground)
									0.128891	0.132758
									Water for rxn	Water (untreated)
									0.0112543	0.0112543
								Water for rxn	Water (untreated)
								0.0747565	0.0747565
							Water for rxn	Water (untreated)
							0.116238	0.116238
		Water for rxn	Water (untreated)
		2.08	2.08
	Hydrogen chloride	Chlorine	sodium chloride in brine 26 wtpct	salt rock, in ground
	803.214	579.123	468.768	468.768
			Water for rxn	Water (untreated)
			136.831	136.831
		Ethylene	Naphtha	blue water
		228.387	232.858	652.935
				oil (in ground)
				235.885
	oxygen from air	Air (untreated)
	2810.38	2810.38
